# See and Hear What the Field Is Discussing!

*Psychiatric Services* features research related to the delivery of mental health services, especially for people with serious mental illness in community-based treatment programs. Provision of high-quality care involves collaboration among a variety of professionals. Clinicians, administrators, and policy makers look to *Psychiatric Services* for research on how to deliver evidence-based treatments, to take an integrated “whole-health” approach to care, and to better engage individuals in their care. Mental health’s current focus on patient-centered, recovery-oriented care and on dissemination of evidence-based practices is transforming service delivery systems at all levels. Research published in *Psychiatric Services* contributes to this transformation.

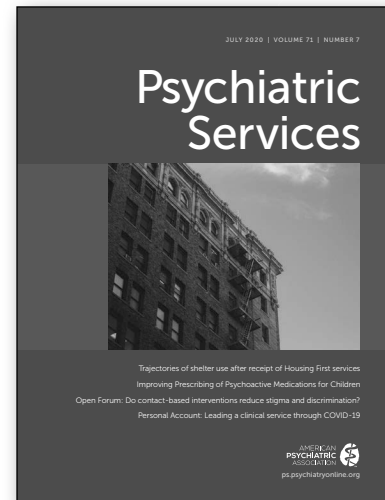

## Our Most Talked About Articles so far in 2020:

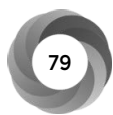

### National Study of Telepsychiatry Use in U.S. Emergency Departments

Article in in *Psychiatric Services*, June 2020

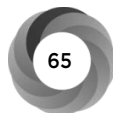

### The Journey to Use Medication Optimally to Support Recovery

Personal Account in *Psychiatric Services*, April 2020

## Dive Deeper With “From Pages to Practice” Podcast

Editor Lisa Dixon, M.D., M.P.H., and Podcast Editor and co-host Josh Berezin, M.D., M.S., discuss the latest mental health services research published in *Psychiatric Services* and why it is relevant. Topics include community-based treatment programs, collaborative care, evidence-based treatment and service delivery, criminal and social justice, policy analysis, and more.

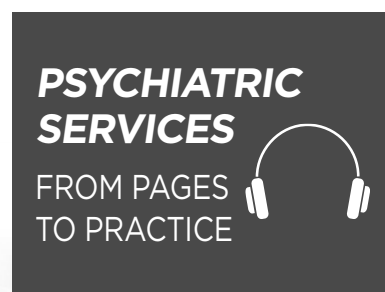

### July 2020: State Policies Regarding Medical Marijuana

Erik Messamore, M.D., Ph.D., joins Dr. Dixon and Dr. Berezin to discuss suggestions for informing the public more effectively about the potential benefits and risks of marijuana in state medical marijuana programs.

### May 2020: Mental Health Policy in the Era of COVID-19

Matthew Goldman, M.D., M.S., joins Dr. Dixon and Dr. Berezin to discuss the significant changes in mental health policy prompted by the COVID-19 crisis.

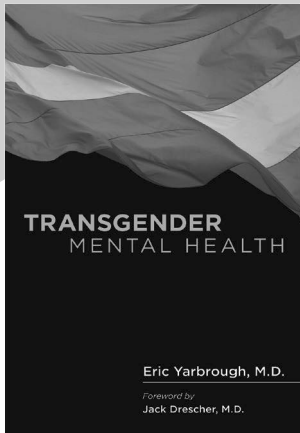

## Transgender Mental Health

Eric Yarbrough, M.D.

This book is designed to educate clinicians on how to address the basic needs of the TGNC community, and thus increase access to mental health care for TGNC individuals, which has been sorely lacking to this point.

Four sections address topics such as the history of the TGNC experience, mental health factors particular to the TGNC community, physical health—including hormones—of TGNC individuals, and gender-affirming surgical procedures, as well as nonsurgical interventions. Summarizing key points and review questions are included at the end of each chapter.

Relevant for a range of mental health professionals, *Transgender Mental Health* is a simple yet thorough primer on the complex topic of gender diversity.

2018 • 339 pages • ISBN 978-1-61537-113-6 • Paperback • \$55.00 • Item #37113

2018 • 339 pages • ISBN 978-1-61537-189-1 • eBook • \$44.00 • Item #37189

## Pocket Guide to LGBTQ Mental Health Understanding the Spectrum of Gender and Sexuality

Edited by Petros Levounis, M.D., M.A., and Eric Yarbrough, M.D.

This title reflects sweeping changes in our understanding of gender and sexuality over the last two decades. The book aims to help clinicians, patients, parents, and administrators master the fundamentals of sexual orientation and gender identity. Each chapter begins with the psychological and cultural context of a particular facet of human sexuality, including an exploration of its history and terminology, then proceeds to describe issues and challenges currently faced by people who embrace these identities. In addition, the book addresses common themes that emerge in counseling and psychotherapy with LGBTQ2IAPA people.

Practical and written the *Guide* gives mental health clinicians the tools to understand, relate to, and care for patients of diverse gender identities and sexual orientations.

2020 • 214 pages • ISBN 978-1-61537-275-1 • Paperback • \$58.00 • Item #37275

2020 • 214 pages • ISBN 978-1-61537-310-9 • eBook • \$46.50 • Item #37310

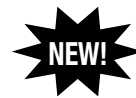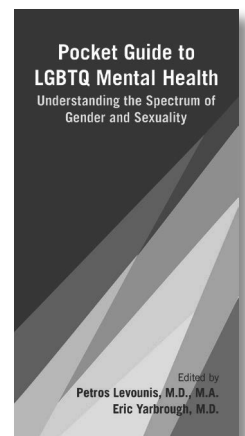

## The LGBT Casebook

Edited by Petros Levounis, M.D., M.A., Jack Drescher, M.D., and Mary Barber, M.D.

*2014 Society of Sex Therapy and Research Health Professional Book Award Winner!*

*The LGBT Casebook* provides a general overview and roadmap for clinicians new to treating LGBT individuals, and it deepens and updates knowledge for those already seeing these patients in their practices. The book is a collection of case studies of patients with a DSM diagnosis, followed by the case author's insights into how he or she helped a particular patient work through them. By leading the reader through mental health issues within the context of LGBT lives, the book helps mental health professionals better address the unique needs of the LGBT community during both assessment and treatment.

2012 • 324 pages • ISBN 978-1-58562-421-8 • Paperback • \$70.00 • Item #62421

2012 • 324 pages • ISBN 978-1-58562-959-6 • eBook • \$56.00 • Item #62959

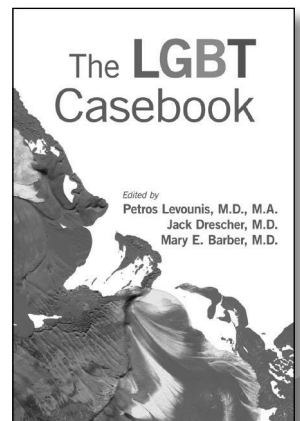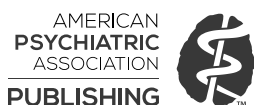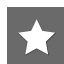

20% Discount for American Psychiatric Association Members  
25% Discount for APA Resident-Fellow Members

ORDER @ [www.appi.org](http://www.appi.org) | Email: [appi@psych.org](mailto:appi@psych.org) | Toll Free: 1-800-368-5777

**ADULT INPATIENT PSYCHIATRIST/DIVISION CHAIR**  
Position F52380

The Department of Psychiatry at Virginia Commonwealth University (VCU) School of Medicine is seeking an accomplished and innovative Board Certified Psychiatrist to serve as Division Chair of its Adult Inpatient Services. This is an opportunity for a dynamic leader to help the Department of Psychiatry build collaborative relationships with clinicians, scientists, trainees, and students and to work across the university and externally. The successful candidate will have a leadership role in the department and hospital, reporting directly to the Department Chair. The incumbent will be expected to have administrative, leadership, teaching, and research experience. Resources will be available to the selected candidate to assist in building federally funded research studies/ programs and recruiting other clinicians/investigators to the team. The successful candidate should have the vision and interest in helping VCU become a recognized leader in psychiatric care, scholarly activities, and research at the local, regional, national, and international level.

The core responsibilities of the Adult Inpatient Division Chair include, but are not limited to: managing and directing a 42-bed adult inpatient unit, supervising and training medical students, residents, and fellows, coordinating, developing and implementing best practices, some clinical duties, and developing/conducting research. Applicants should have a U.S. medical degree or equivalent (MD, MD/PhD, or DO), with licensure (or license eligible) to practice in the Commonwealth of Virginia and DEA licensure. Five to ten years of post-residency experience is required and fellowship training is preferred. Successful applicants will have demonstrated experience working in and fostering a diverse faculty, staff, and student environment, or commitment to do so as a faculty member at VCU.

Beginning in January 2020, Dr. Robert Findling will be VCU's Department of Psychiatry's Chair, who comes to us from Johns Hopkins. Dr. Findling's recruitment will serve as a catalyst for clinical growth as well as vigorous support for enhancement of scholarly activities both within the Adult Inpatient Division as well as the rest of the Department. VCU's Department of Psychiatry <http://psych.vcu.edu> employs over 60 full-time faculty and has well-funded research in genetics <http://www.vipbg.vcu.edu>, addictions <http://www.idas.vcu.edu>, child and women's mental health, and psychopharmacology. VCU Psychiatry is ranked #19 by NIH for research funding and its residents and faculty are ranked #1 for teaching in VCU's School of Medicine. VCU is a large urban university with a robust health science campus and 750-bed university hospital. Richmond, the State Capital, has a moderate climate and a rich mix of history with modern facilities, excellent suburban housing, public/private schools, and a low cost of living.

This is an excellent opportunity for an experienced clinician with interests in academic psychiatry. Salary, rank, and tenure status are contingent upon the candidate's qualifications. Interested applicants should apply online at <https://www.vcujobs.com/postings/96831>. Only electronic applications will be accepted. All submitted applications must include a letter of interest and CV. Questions should be directed to Tammy Beltz, HR Manager at [Tammy.Beltz@VCUHEALTH.org](mailto:Tammy.Beltz@VCUHEALTH.org).

Virginia Commonwealth University is an equal opportunity, Affirmative Action University providing access to education and employment without regard to age, race, color, national origin, gender, religion, sexual orientation, veteran's status, political affiliation or disability.

*"With mental health, addictions and neurosciences being a prominent strategic focus for us, we are committed to building on our academic strengths,"*  
said Michael Rao, Ph.D., President of VCU and VCU Health System.

**FREE Online Subscription to *Psychiatric Services* for APA Resident-Fellow Members (RFMs)!**

American Psychiatric Association Resident-Fellow Members (RFMs) can receive a free online subscription to *Psychiatric Services*.

Visit [ps.psychiatryonline.org](http://ps.psychiatryonline.org) for full-text access to all of the content in this highly ranked, peer-reviewed monthly journal. *Psychiatric Services* focuses on service delivery in organized systems of care, evolving best practices, and federal and state policies that affect the care of people with mental illnesses.

Please visit [ps.psychiatryonline.org](http://ps.psychiatryonline.org) and log in with your APA username and password.

Psychiatry residents who are not currently APA Resident-Fellow Members should consider membership in the American Psychiatric Association. The benefits provided to residents are an example of how the APA serves the needs of its members throughout their careers. The low introductory dues APA extends to RFMs are even waived for the first year. Please visit [www.psychiatry.org/join-apa](http://www.psychiatry.org/join-apa) for more information.

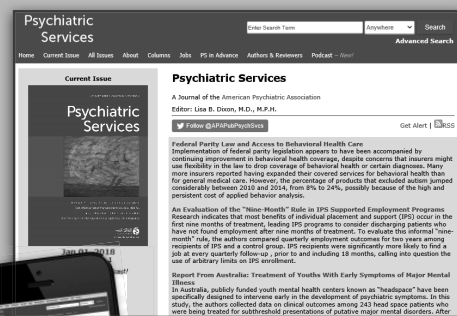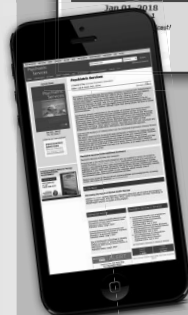

Tune in to our monthly podcast.

**PSYCHIATRIC SERVICES**  
FROM PAGES TO PRACTICE

AMERICAN PSYCHIATRIC ASSOCIATION PUBLISHING

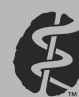

Follow @APAPubPsychSvcs

# Answers

Serious mental illness (SMI) involves complex conditions. That means mental health clinicians often have complex questions.

Now there is a better way to save time and find evidence-based answers. Use SMI Adviser's FREE clinician-to-clinician consultations. Submit any questions about SMI and receive a personal response from one of our national experts. It takes just two minutes and you get a direct answer within one business day.

This is just one of many free resources from SMI Adviser.

**Better clinical support. Better resources. Better care for people who have SMI.**

**Join our #MissionForBetter at [SMIadviser.org](https://www.smiadviser.org)**

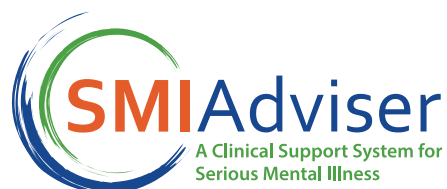

**GRANT STATEMENT**

Funding for this initiative was made possible (in part) by Grant No. 1H79SM080818-01 from SAMHSA. The views expressed in written conference materials or publications and by speakers and moderators do not necessarily reflect the official policies of the Department of Health and Human Services; nor does mention of trade names, commercial practices, or organizations imply endorsement by the U.S. Government.

© 2020 American Psychiatric Association. All rights reserved.

An APA and SAMHSA Initiative

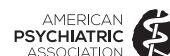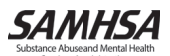

Source: https://ps.psychiatryonline.org/doi/suppl/10.1176/ps.2020.71.issue-8/suppl_file/back.pdf
