AUGUST 2020 | VOLUME 71 | NUMBER 8

# Psychiatric Services

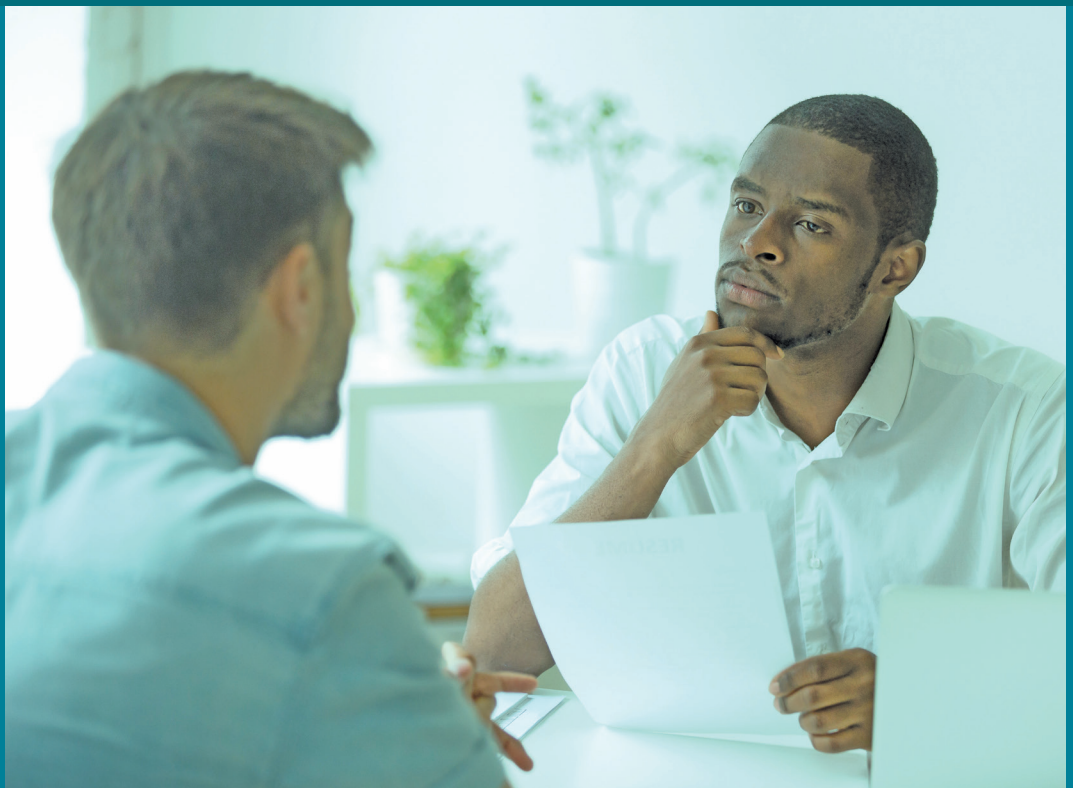

Disclosing mental illness in the workplace

Quality improvement models for mental health care

On the front lines of COVID-19

Editor's Choice: Resilience

AMERICAN  
**PSYCHIATRIC**  
ASSOCIATION

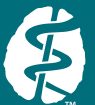

[ps.psychiatryonline.org](http://ps.psychiatryonline.org)
