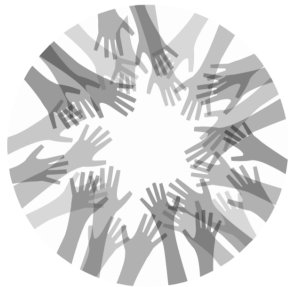

# REACH

Recognizing and Eliminating disparities in Addiction through Culturally informed Healthcare

Want to learn how to improve care for racial and ethnic minority patients with substance use disorder?

## ABOUT REACH

REACH is 1-year program for trainees interested in pursuing an Addiction Fellowship beginning July 2021, as well as medical students, residents, APRN/NP and PA trainees from racial/ethnic underrepresented minority (URM) backgrounds, all specialties.

Scholars endeavor to be change agents to improve the health and health care of racial/ethnic URM patients with substance use disorders (SUDs).

## APPLICATION TIMELINE

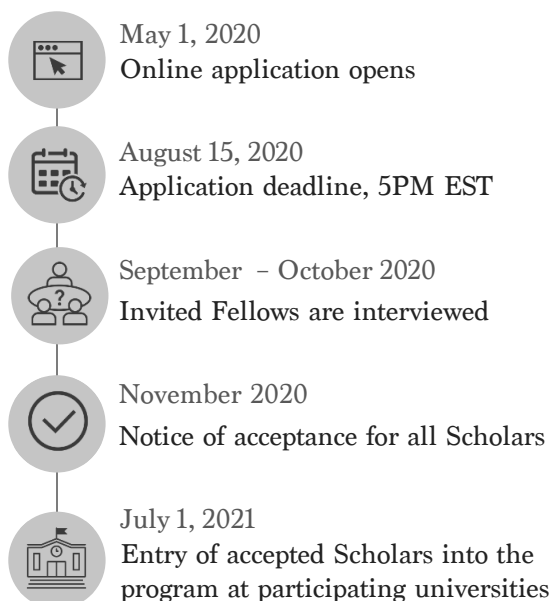

Funding provided for scholars to attend the 1-Week Intensive, 1 conference, and up to \$104,000 for Fellowship programs.

## CURRICULUM

- 1-Week Intensive course at Yale University; includes Advocacy, Racism and Health, Systems of Care, Structural Competency, Harm Reduction, Medical Co-morbidities, and more.
- Scholarly Project to improve health outcomes for racial/ethnic URMs
- Professional Mentorship
- Monthly Webinars

## ELIGIBILITY

- In training (i.e. entering fellowship, in residency or school) as of July 1, 2021
- U.S. Citizen
- Racial/ethnic minority background (i.e. Black, African, African-American, Non-Caucasian Hispanic or Latinx, American Indian, Alaskan Native, Native Hawaiian, Pacific Islander)

## FOR MORE INFORMATION:

WEBSITE: <https://reachgrant.org>

EMAIL: [reach@aaap.org](mailto:reach@aaap.org)

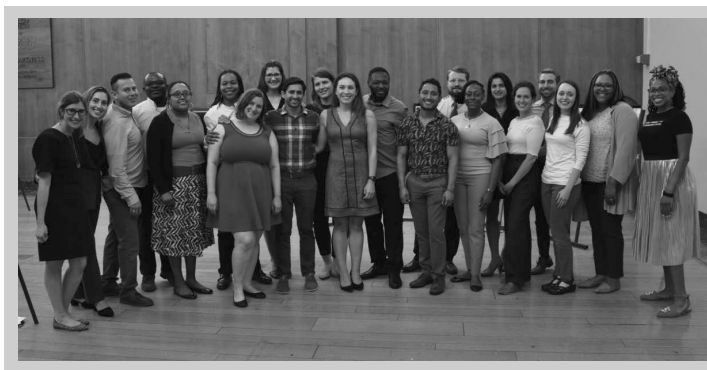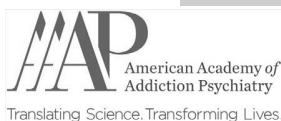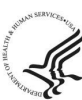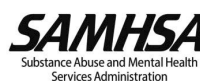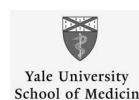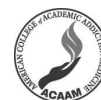

Funding for this initiative was made possible (in part) by grant no. 5H79TI081358-02 from SAMHSA. The views expressed in written conference materials or publications and by speakers and moderators do not necessarily reflect the official policies of the Department of Health and Human Services; nor does mention of trade names, commercial practices, organizations imply endorsement by the U.S. government
